# Supplementary material
Source: Elsevier journal article supplement (https://www.sciencedirect.com/science/article/pii/S1699258X22002832)

Anexos

## Anexo 1. Estrategia de búsqueda

| **Pregunta** | En los pacientes sometidos a trasplante alogénico de progenitores hematopoyéticos con enfermedad injerto contra huésped crónica con afectación fascial/articualr, ¿cuáles son sus características clínicas, las herramientas de evaluación diagnóstica y el tratamiento? | |
| --- | --- | --- |
| **¿De qué tipo es?** | Diagnóstico, prevalencia, descriptiva | |
| **PICOT** | Para la selección | Sinónimos o palabras clave para ayudarnos en la búsqueda |
| **Población** | Enfermedad injerto contra receptor crónica | 'chronic graft versus host reaction', 'chronic graft versus host disease', 'c-gvhd', 'cgvhd', 'chronic gvhd', 'chronic graft vs host disease' |
| **Intervención** | Afectación musculoesquelética, fascitis, artropatía, | 'musculoskeletal disease', 'musculoskeletal complaint', 'musculoskeletal diseases', 'musculoskeletal disorder', 'musculoskeletal symptom', 'fasciitis', 'arthropathy', 'acquired joint deformities', 'articular defect', 'articular deformity', 'articular disease', 'articular disorder', 'joint defect', 'joint deformities, acquired', 'joint deformity', 'joint disease', 'joint diseases', 'joint disorder'. |
| **Comparador** |  |  |
| ***Outcome*** | Características clínicas  Diagnóstico  Tratamiento | 'clinical feature', 'clinical aspect', 'clinical features', 'diagnostic procedure', 'diagnosis, measurement and analysis', 'diagnostic method', 'diagnostic procedures', 'diagnostic techniques', 'diagnostic techniques and procedures', 'therapy', 'combination therapy', 'disease therapy', 'disease treatment', 'diseases treatment', 'disorder treatment', 'disorders treatment', 'efficacy, therapeutic', 'illness treatment', 'medical therapy', 'medical treatment', 'multiple therapy', 'polytherapy', 'somatotherapy', 'therapeutic action', 'therapeutic efficacy', 'therapeutic trial', 'therapeutic trials','therapeutics', 'therapy', 'therapy, medical', 'treatment effectiveness', 'treatment efficacy', 'treatment, medical' |
| **Diseño ideal para contestar a la pregunta** | Observacional para clínica (series de casos), cohortes para incidencia, transversal para diagnóstico y prevalencia, ensayos clínicos y revisiones sistemáticas de ensayos clínicos para tratamiento | |

## Anexo 2. Artículos incluidos en la revisión

| **Descripción de los artículos relacionados con fascitis incluidos en la revisión n= 28** | | | | |
| --- | --- | --- | --- | --- |
| **Estudio** | **Participantes** | **Intervención Escalas/scores evaluados** | **Resultados Conclusiones** | **Calidad de la evidencia**  **Oxford (UK)** |
| **Clínica** | | | | |
| **Hidalgo 2022 (24)**  Estudio observacional, retrospectivo (2014-2020) | N= 39 | Características clínicas y relacionadas con el trasplante en pacientes con fascitis eosinofílica –like | Síntomas articulares inespecíficos pueden ser predictores de EICRc tipo fascitis eosinofílica | Baja |
| **Chalopin**  **2021(25)**  Caso aislado | Varón de 46 años  + 227 días Post-T | Características clínicas | Importancia RM para guiar biopsia | Muy baja |
| **Orteu 2020 (26)**  Revisión |  | Características clínicas de EICRc esclerodermiforme | Descripción clínica | Muy baja |
| **Varjú 2020 (27))**  Revisión |  | Características clínicas y posibilidades terapéuticas | Descripción clínica  Tratamiento | Muy baja |
| **Gandelman**  **2019 (14)**  Estudio observacional prospectivo multicéntrico | N=182 | Porcentaje de región anatómica involucrada  NIH 2005 Skin Scores de 0-3  Puntuaciones de esclerosis y fascia de Hopkins  Características clínicas  Vienna Skin Score | Distribución anatómica de  esclerosis profunda más comunes en extremidades superiores e inferiores, con alto nivel de simetría | Moderada |
| **Ferreli 2017 (28)**  Revisión |  | Revisión de manifestaciones cutáneas esclerodermiformes en EICRc | Descripción clínica, histopatológica y de manejo y pronóstico | Muy baja |
| **Khan 2016(29)**  Caso aislado | +28 meses Post-T | Miofascitis macrofágica. Biopsia | Tto con corticoides de forma precoz para control clínico y prevención de secuelas | Muy baja |
| **Chu 2014 (30)**  Caso aislado | Varón de 51 años  3 años Post-T | Características diferenciales con la variante esclerodermiforme del EICRc | Necesidad de biopsia profunda | Muy baja |
| **Inamoto 2013(31)** Estudio observacional retrospectivo | N=977 EICRc  Reclutamiento mayo 2000-diciembre 2009 | Desarrollo de esclerosis cutánea, fascial o articular | 20% (210) esclerosis, de ellos 70 (33%) solo articular/fascial  Factores asociados a esclerosis | Moderada |
| **Ziemer 2013 (32)**  Revisión |  | Revisión de características clínicas, manejo y tratamiento | Biopsia profunda (tejido subcutáneo y fascia) | Muy baja |
| **Abio 2011 (33)**  Caso aislado | Mujer 18 años  + 19 meses Post-T | Compromiso articular y fascitis extensa | Diagnóstico con biopsia profunda, RM y elastografía  TTo con corticoides, micofenolato y PUVA | Muy baja |
| **Carpenter 2011 (5)**  Descripción de evaluación clínica |  | Manejo integral de EICRc  Importancia de historia clínica dirigida, exploración física sistematizada | Mayor eficiencia y confianza en evaluación de pacientes con EICRc | Muy baja |
| **Sauter 2009(34)**  Caso aislado | Varón 49 años  +991 días Post-T | Compromiso fascial y muscular cervical.  RM, biopsia. Tto corticoides | Utilidad de RM. Papel de RT en fibrosis | Muy baja |
| **Oda 2009 (18)**  Estudio observacional retrospectivo  Serie de casos enero 1994-marzo 2005 | N=8 | Incidencia  Factores de riesgo  Características clínicas | Diagnóstico y tratamiento precoz, con biopsia y RM para evitar discapacidad | Moderada baja |
| **Jacobsohn 2009 (35)**  Ensayo abierto fase II | N=50  Evaluación de pentostatina en el tratamiento de EICRc refractaria a corticoides | Comparación de las respuestas cutáneas utilizando las escalas NIH y Hopkins | 80% de acuerdo en la respuesta general en la evaluación final del tratamiento  64% de acuerdo para la fascitis /esclerosis inmóvil | Moderada baja |
| **Patel 2008 (36)**  Caso aislado | Varón de 41 años  + 671 Post-T | Desarrollo de esclerosis cutánea profunda y fascitis con contracturas articulares  Tratamiento fotoféresis | Diagnóstico precoz RM | Muy baja |
| **Peñas 2006** (**37)**  **2002 (24)**  Estudio prospectivo enero 1982-diciembre 2000 | N=17  EICRc esclerodermiforme  Afectación articular 23% | Descripción clínica e histopatológica | Ondulación de la piel (75%)  Ausencia de Raynaud  Importancia de biopsia profunda  Importancia de tto combinado (corticoides + inmunosupresor) | Moderada baja |
| **Schaffer 2006 (38)**  Revisión |  | Descripción clínica e histopatológica | Cambios en el trasplante alogénico de progenitores hematopoyéticos durante últimos 10 años  Evolución de conceptos EICR aguda y crónica | Muy baja |
| **Minciullo 2006 (39)**  Casos aislados | N=2  Caso 1 + 21 meses Post-T  Caso 2 + 9 meses Post-T | Fascitis eosinofílica | Tto con fotoféresis extracorpórea | Muy baja |
| **Carroll 2005 (40)**  Caso aislado | Varón 19 años  + 15 meses Post-T | Fascitis  Calambres musculares progresivos y debilidad | Importancia biopsia profunda  No respuesta a tto | Muy baja |
| **Ustum 2004 (41)**  Caso aislado | Varón de 35 años  +1 año Post-T | Miositis y fascitis | Importancia de la biopsia | Muy baja |
| **Kim 2003 (17)**  Caso aislado | Mujer de 33 años  +20 meses Post-T | Endurecimiento cutáneo y artralgias  Posteriormente fascitis proximal miembros superiores e inferiores | Entidad distintiva | Muy baja |
| **Janin 1994 (42)**  Estudio observacional retrospectivo (enero 1974- enero 1991) | N total = 475  N=14 EICRc con fascitis | Características clínicas Biopsia | Inicio con edema  Similitud al síndrome de mialgia eosinofílica | Moderada baja |
| **Diagnóstico** | | | | |
| **Wolff 2021 (43)**  Documentos de consenso |  | Objetivos de investigación para formas con alta morbilidad de EICRc, incluida la esclerosis cutánea avanzada y la fascitis  Estrategias para el diseño efectivo de ensayos | Herramientas de evaluación objetiva | Moderada baja |
| **Miller 2018 (13)**  Estudio observacional |  | ROM cada 6 meses en hombros, codos, muñecas y tobillos | Evaluación inicial precoz, cambios en el tiempo y respuesta al tto | Muy baja |
| **Clark 2009 (44)**  Estudio observacional transversal | N total=62  N= 15 pacientes RM | Afectación de piel (47%), septos fibrosos subcutáneos (87%), fascia profunda (80%), epimisio (60%) y músculo (20%) | RM complemento útil para evaluación clínica de fibrosis y confirmar anomalías musculares y fasciales antes de limitaciones del ROM | Moderada baja |
| **Shulman 2006 (45)**  Documento de consenso |  | Desarrollo de consenso para diagnóstico histopatológico EICRc | Categorías de diagnóstico final  Hojas de recogida de historia clínica e histopatología | Moderada baja |
| **Révelon 1999 (46)**  Estudio observaconal prospectivo | N= 69 pacientes con inflamación aguda en extremidades  N= 2  EICRc  Edema en MMII | RM: afectación fascial | RM sensible para detección cambios en fascia y músculo  Localización de mejor sitio para biopsia  Monitorización de tto | Moderada |

| **Descripción de los artículos relacionados con artropatías incluidos en la revisión** | | | | |
| --- | --- | --- | --- | --- |
| **Estudio** | **Participantes** | **Intervención Escalas/scores evaluados** | **Resultados Conclusiones** | **Calidad de la evidencia**  **Oxford (UK)** |
| **Clínica** | | | | |
| **Shakshouk 2021 (47)**  Caso aislado | Varón 55 años  + 5 años Post-T  Incapacidad progresiva para extensión completa activa y pasiva de 2º-5º dedos de mano derecha, que empeoraban con la extensión de la muñeca y mejoraban con la flexión | Neurológico normal  RM: fascitis y miositis de flexores profundos y superficiales  Mejoría tras rituximab, UVB de banda estrecha y fisioterapia | Atrapamiento mecánico de miotendones flexores del antebrazo | Muy baja |
| **Hamilton 2021 (7)**  Estudio transversal  (mayo–agosto 2020) | N= 137  EICRc 5 años previos | Encuesta online sobre discapacidad cognitiva, física y laboral | 47% discapacidad cognitiva, 67% física grave, 63% laboral | Muy baja |
| **Vukić 2016 (48)**  Estudio observacional retrospectivo (octubre 2013-  octubre 2015) | N=17 EICRc sin afectación fascial/articular  N= 12 con EICRc fascial/articular | Comparación de características clínicas, funcionales, parámetros de laboratorio y escalas (ROM; P-ROM, test de la marcha y fuerza de prensión) | 41.3% esclerosis fascial/articular  Alta correlación con la afectación cutánea  Niveles de C3 elevados | Moderada- baja |
| **Kuzmira 2014 (49)**  Estudio transversal | N= 283  Valoración de afectación articular aislada en EICRc | NIH  P-ROM  Afectación articular 60%, al excluir pacientes con esclerosis 15% (leves 74%, moderadas 21%, graves 5%)  Tobillos > hombros > muñecas > dedos > codos | Afectación articular aislada: menos discapacidad funcional, debuta antes tras el diagnóstico de EICRc niveles más bajos de marcadores de inflamación. | Moderada - baja |
| **Barnabe 2009 (50)**  Casos aislados y revisión | - Varón 24 años  Poliartritis y ANA + 9 meses Post-T  - Mujer 21 años  1 años Post-T dolor hombros, cadera izquierda y artritis rodilla izquierda e IFP  - Varón 49 años  +4 años Post-T sinovitis asimétrica de manos, muñeca y 2 dactilitis además de psoriasis | Caso 1 Rx normales  Caso 2 RM con derrame articular  Caso 3: aumento de VSG | Resolución de cuadros inflamatorios tras AINES en caso 1, AINES e infiltración en caso 2. Tto IS en caso 3  Factores asociados a desarrollo de autoinmunidad | Muy baja |
| **Carpenter 2008 (51)**  Revisión | Efectos tardíos de EICRc | - Miopatía y miositis  - Calambres  - Fascitis  - Contracturas articulares | - Elevación de CK, aldolasa, AST, posible presencia de anticuerpos, EMG patológico  - Importancia de ejercicios | Muy baja |
| **Diagnóstico** | | | | |
| **Agnieszka 2013 (99)**  Casos aislados | Varón 53 años  Mujer 23 años  EICRc esclerodermiforme con contracturas en MMSS y MMII y dificultad para caminar | - Tto UVA1  - Medida de elasticidad de la piel con Cutometer MPA 480  - Grosor y densidad de la piel con ecografía de alta frecuencia (20MHz) antes y después de fototerapia | Aumento de elasticidad de la piel y del ROM, con mejor movilidad | Muy baja |
| **Zsigmond 2009 (100)**  Caso aislado | Varón 58 años  +1 Post-T polisinovitis en rodillas, tobillos, manos y hombros | - RM parecía osteomielitis  - Gammagrafía sugirió EICRc articular, confirmado con microbiología e histopatología  - Mejoría clínica con infliximab, confirmándose el diagnóstico | Patrón e importancia de gammagrafía en diagnóstico | Muy baja |
| **Nozzoli 2008 (98)**  Caso aislado | Varón 33 años  + 1 años Post-T  Tenosinovitis dolorosa bilateral en caderas y rodillas | EMG normal  TAC sinovitis caderas  Líquido sinovial de rodillas no inflamatorio  Autoanticuerpos negativos  Biopsia: hiperplasia de células sinoviales, aumento de vascularización, sinovitis crónica con activación de fobroblastos | Análisis FISH mostró cariotipo XX derivado del donante en las células que infiltran sinovial, apoyando el diagnóstico de sinovitis relacionada con EICRc | Muy baja |

| **Descripción de los artículos relacionados con tratamiento incluidos en la revisión** | | | | |
| --- | --- | --- | --- | --- |
| **Estudio** | **Participantes** | **Intervención Escalas/scores evaluados** | **Resultados Conclusiones** | **Calidad de la evidencia**  **Oxford (UK)** |
| **Tratamiento** | | | | |
| **Inamoto 2020(52)** Estudio observacional prospectivo multicéntrico y longitudinal.  Serie de casos (extensión del estudio de 2014) | -Grupo 1 (n=209): EICRc esclerótica fascial/ articular > 18 años según criterios de evaluación NIH 2005 (2007-2012)  -Grupo 2 (n=191): EICRc esclerótica fascial/articular >18 años según criterios de evaluación NIH 2014 (2013-2017) | Evaluación cada 6 meses salvo inicial a los 3 meses en los casos incidentes:  Score NIH articulación/fascial (ROM) (rango 0–3)  P-ROM ((rango 4–25)  PRO  EGM | Redefinir los criterios de respuesta terapéutica | Moderada |
| **Smith 2017 (53)**  Revisión | EICRc fascial similar a fascitis eosinofílica: puede causar edema (1º), fibrosis y contractura articular.  Muñecas, hombros y tobillos, articulaciones distales afectadas 1º de forma simétrica y bilateral.  Puede haber destrucción articular | Medidas ecográficas de elasticidad  P-ROM en todos los pacientes | Múltiples enfoques para restaurar ROM  Intervención temprana esencial  Férulas y estiramientos  Terapia ocupacional Terapia descongestiva, Prendas compresivas | Muy baja |
| **Ganta 2015(54)**  Casos aislados y revisión de la literatura | 31 casos fascitis eosinofílica:  3 series de casos de 2, 8 y 14 y 7 casos aislados | Manifestaciones clínicas  Tratamiento | Actualización en opciones terapéuticas  (corticoides, inhibidores calcioneurina, imatinib) | Moderada |
| **Inamoto 2014 (12)**  Estudio observacional prospectivo, multicéntrico y longitudinal.  Serie de casos. | Pacientes >2 años con EICRc:  N total= 567  N con afectación fascial= 164  - Casos incidentes < 3 meses de diagnóstico de EICRc  - Casos prevalentes  > o igual a 3 meses de diagnóstico de EICRc | Evaluación cada 6 meses salvo inicial a los 3 meses en los casos incidentes: ROM (range 0–3)  P-ROM (range 4–25)  Subscore de Lee para músculo/articulación (rango 0–16) Escala de síntomas de Lee (rango 0–100) Evaluación global (rango 0–10)  Calidad de vida:  - FACT-G  - SF-36 MCS  - SF 36 PCS  - HAP-MAS  - HAP-AAS  Medidas de función física:  - Test de la marcha en 2 minutos  - Fuerza de prensión mano | Validar las escalas del NIH para diagnóstico y respuesta al tratamiento de EICRc fascial/articular Correlación con morbilidad (discapacidad y pérdida de calidad de vida) | Moderada |
| **Osumi 2012(55)**  Caso aislado | Varón 16 años | Imatinib en tto de fascitis | Eficaz para prevención y mejoría de la fascitis fibrótica como manifestación de la EICR crónica | Muy baja |
| **Marks 2011 (8)**  Documento consenso |  | Terapia de apoyo en manifestaciones cutáneas y musculoesqueléticas | Consenso sobre las opciones de tto basadas en la evidencia  Pautas para la práctica clínica diaria | Baja |
| **Sbano 2004 (56)**  Caso aislado | Mujer de 54 años  + 15 meses Post-T | Fascitis, limitación articular en codos  ANA + nucleolar Ecografía | Tratamiento eficaz foto~~af~~éresis | Muy baja |
| **Micheletti 2020** (**15)**  Estudio prospectivo | N=6  Limitación ROM y contracturas  Media 5.5 ttos previos | - 3 ttos/mes en área de 10 × 6 cm en articulación objetivo  - fotografías, ROM y ecografía de alta resolución al inicio, 1 semana después de cada sesión de láser y 3 meses después de la sesión final  - biopsia por punción, evaluaciones y cuestionarios de salud y discapacidad al inicio y 3 meses después de la sesión final | Evaluación de seguridad, tolerabilidad y eficacia del tto con láser fraccional ablativo CO2  Remodelación del colágeno, con mejora modesta en ROM y la función articular | Muy baja |
| **Punatar 2020 (57)**  Serie de casos (marzo 2017-enero 2018) | N=5  Leflunomida 20mg/día (inducción 100mg 3 días) | - Seguimiento mínimo 6 meses  -NIH y P-ROM al inicio, 1 mes, 3 meses y cada 3 meses | Eficacia de leflunomida, con remisión completa a los 3 meses | Muy baja |
| **Wagenknecht 2020 (58)**  Serie de casos  (2005-2018) | N=13 | 6-8 ciclos de fotoféresis extracorpórea /14 días  P-ROM | Mejoría en contracturas articulares; rango fisiológico  Disminución de dosis de corticoides | Muy baja |
| **Vijaysekharan 2018 (59)**  Caso aislado | Mujer 46 años  +133 Post-T  +144 Leflunomida | Dolor, rigidez en hombros y manos  RM normal  Diagnóstico clínico | Respuesta parcial al mes y completa a los 3 meses del inicio de leflunomida | Muy baja |
| **Smith 2015 (60)**  Revisión | Pacientes con contracturas esclerodermatosas  Miopatías, miositis | - ROM  - NIH  - AVD (índice Barthel)  - EMG  - Biopsia muscular | Calor superficial  Baños de parafina  Ultrasonido más Estiramientos  Iontoforesis  Terapia ocupacional para ROM  Cirugía probablemente ineficaz | Muy baja |
| **Bojanić 2013 (61)**  Serie de casos | N=7  Tto con fotoféresis extracorpórea | Afectación oral y cutánea  Limitación movilidad articular | Mejora o estabilización en cambios de la piel y movilidad articular | Muy baja |
| **Drobyski 2011 (62)**  Serie de casos | N=8 (6 EICRa y 2 EICRc)  Tto con tocilizumab 8mg/Kg /3-4 sem | Afectación cutánea y articular en 2 pacientes (MMII) | Mejoría movilidad articular y afectación cutánea  Disminución sustancial en inmunosupresores | Muy baja |
| **Choi 2009 (63)**  Caso aislado | Varón 25 años  Dolor muscular y rigidez poliarticular  Contracturas en hombro, codo y cadera  Limitación ROM | Anquilosis en Rx de codos  Artritis en codos en gammagrafía | Mejoría con RHB: masaje correctivo, calor, ultrasonidos, baño de parafina, ejercicio de estiramiento de articulaciones 2 veces al día, hidromasaje, fortalecimiento de las 4 extremidades, entrenamiento de AVD | Muy baja |
| **Kim 2008 (16)**  Caso aislado | Varón 23 años  Contracturas articulares MMSS Pérdida ROM y capacidad funcional  Preservación articular y muscular, afectación de piel y fascia | Cirugía correctiva: múltiples plastias Y-V | Restauración del movimiento del hombro (abducción pasiva completa)  Codo con limitación extensión 10-15 ° | Muy baja |
| **Otros estudios de tratamiento en EICRc eslcerodermiforme con afectación fascial/articular** | | | | |
| **Radojcic 2021 (64)**  Estudio abierto | N= 6  Afectación cutánea y musculoesquelética  ≥ 2 líneas previas de tto | Inhibición de Hedgehog con vismodegib v.o. /24h  Evaluación mensual de respuesta 3 meses y luego cada 2 meses | 83% lograron respuesta parcial a los 3 meses según criterios de respuesta NIH  66% disminuyeron >70% dosis de corticoides  Nueva posibilidad terapéutica | Muy baja |
| **Molés-Poveda 2021 (65)**  Revisión | Intervenciones de RHB en tto multidisciplinario de EICR esclerótica de la piel y la fascia | RHB multicomponente efectiva para mejorar ROM | Ejercicios de estiramiento seguros y bien tolerados  Parafina  Masaje | Muy baja |
| **Voltarelli 2021 (66)**  Serie de casos | N= 3  Células madre mesenquimales (CMM) expandidas in vitro: involucradas en modulación de  respuestas inmunitarias in vivo y en la reparación de tejidos | Infusión de 2 x 106 CMMs/Kg de peso en 2 dosis  -las CMM se obtuvieron de médula ósea de donantes no compatibles | 100% mostraron una respuesta completa al tto,  con recuperación total  Mejoría significativa de movilidad  1 paciente suspendió inmunosupresores | Muy baja |
| **Pidala 2020 (67)**  Ensayo multicéntrico fase II de un solo brazo | N= 50  > 18 años  EICRc definida por consenso NIH  Progresión tras ≥ 1 línea de tto sistémico | Evaluación a los 3 y 6 meses | Eficacia del tto con ixazomib | Moderada baja |
| **Weiss 2020 (68)**  Caso aislado | Varón 28 años  + 6 meses Post-T  EICR esclerodermiforme  >5 líneas de tto | Interleucina-2 subcutánea en dosis bajas diarias durante 8 semanas | Mejoría gradual de esclerosis cutánea hasta resolución completa al año del tto  Reducción progresiva de prednisona hasta suspensión al año de tto  Remisión completa durante 6 años de seguimiento | Muy baja |
| **Labadie 2020 (69)**  Casos aislados | N=2  EICRc esclerodermiforme con contracturas | Tratamiento con láser de CO2 ablativo fraccional (1 paciente además, ungüento de clobetasol bajo oclusión) | Marcada mejoría subjetiva en dolor y movilidad.  Mediciones objetivas: paciente 2 ganó 10º de extensión y 2º de flexión, reducción del 10% en área de piel tratada | Muy baja |
| **Méndez-Baca 2020 (70)**  Caso aislado | Varón 57 años  + 10 meses Post-T EICRc esclerótica con dolor osteomuscular generalizado | Fototerapia UVA asociada con psoraleno (PUVA) oral + Fisioterapia+  Prednisona y tacrólimus  Un año después, nuevo ciclo  de fototerapia con equipo domiciliario de luz ultravioleta B de banda estrecha | Mejoría significativa en movilidad articular, disminución de lesiones escleróticas a partir de 10ª, con mejoría máxima en 35ª.  Un año después, inició nuevo ciclo  de fototerapia con equipo domiciliario de luz  ultravioleta B de banda estrecha | Muy baja |
| **Molés–Poveda 2018 (71)**  Estudio retrospectivo (2001-2016) | N= 18  EICRc esclerodermatosa refractaria a IS  N=2 afectación musculoesquelética  Tto con imatinib | Evaluación médica y respuesta subjetiva de los pacientes a los 1, 3, 6, 9, 12 y 18 meses | 83% respuesta completa, parcial o significativa, 11% no tuvieron cambios y 6% experimentaron enfermedad progresiva | Muy baja |
| **van der Wagen 2018 (72)**  Ensayo clínico prospectivo fase II (enero 2012 –noviembre 2015) | N= 24  Rituximab 4 sem  375mg/m2/sem  Nilotinib 300 mg/12h una semana después de última dosis de RTX | Seguimiento mensual13 meses  - NIH de 2005 | Respuesta clínica en el 71% de los pacientes con 8% que alcanzaron RC  Mayoría de respondedores pudieron reducir su dosis diaria de corticosteroides en > 50% | Moderada- baja |
| **MacDonald 2018 (73)**  Revisión | IL-17, LCR-1 y Janus quinasas (JAK) | Nuevas terapias potenciales en EICRc: abatacept, rinolacept, canakinumab, anti IFN-α, carfilzomib, ixazomib, ponesimod… | Nuevas posibilidades terapeúticas en EICRc; menos corticoides | Muy baja |
| **Hurabielle 2017 (74)**  Estudio retrospectivo (mayo 2015 - julio 2016) | N=12  EICRc esclerodermiforme | Tto con ruxolitinib | 66% No empeoramiento y mejoría parcial de piel  Mejora P-ROM  Disminución.corticoides | Muy baja |
| **Teske 2016 (75)**  Revisión | Revisión de tto con fototerapia en esclerosis cutánea y fascitis eosinofílica | UVA1, UVA de banda ancha, psoraleno más UVA y fototerapia UVB de banda estrecha | Eficacia y perfil favorable de la fototerapia | Muy baja |
| **Delaney 2016 (76)**  Estudio experimental | IFN tipo I | Estudio histológico, inmunohistoquímica, ELISA y microarrays | IFN tipo I regulan la inflamación, la vasculopatía y la fibrosis en EICRc  El bloqueo de la señalización de IFN tipo I mejora la fibrosis dérmica | Muy baja |
| **Arai 2016 (77)**  Estudio prospectivo  aleatorizado cruzado fase II (marzo 2011-junio 2014) | N= 72  Imatinib 200mg/día o rituximab 375mg/m2 iv semanal/4 semanas (nuevo ciclo posible en 3 meses) | - Respuesta significativa a los 6 meses (piel o ROM)  - PRO  - Histopatología  - Cambio en los perfiles de células B | Respuesta clínicamente significativa 26-27%  Células B activadas  definen un subgrupo con más probabilidades de responder a rituximab | Moderada- baja |
| **Baird 2015 (78)**  Ensayo abierto fase II (diciembre 2008-febrero 2011) | N=14  Imatinib en EICRc esclerótica resistente a corticoides | - ROM a los 6 meses  - NIH  - Tolerabilidad  - RM  - Puntuación cutánea  - PRO  - Evaluaciones funcionales  - Biomarcadores de actividad | ROM mejoró en 11/14 pacientes (rango de 3 a 94%)  Imatinib mal tolerado a dosis de 400 mg. Niveles séricos más altos de lo esperado a dosis de 200 mg | Moderada-baja |
| **Malik 2014 (79)**  *Revisión sistemática* y metaanálisis (1984-2012) | 312 estudios  18 cumplieron criterios de selección  N= 595 | - Respuesta completa  - Tasas de respuesta general y por órganos  NIH | FEC es eficaz en EICRc resistente a corticoides con afectación cutánea y musculoesquelética | Alta |
| **Osmola-Mañkowska 2012 (80)**  Revisión | UVA -1 (340-400 nm) | Ventajas UVA1: no es necesario aplicar psoraleno, menor riesgo de reacciones fototóxicas | Tto prometedor  Mejoría de piel y contracturas  Se necesitan más estudios | Muy baja |
| **Lazar 2011 (81)**  Caso aislado | Mujer 16 años  +9 meses Post-T  EICRc esclerodermiforme con contractura de codo derecho, disminución de ROM en tobillos | Imatinib 400mg/día | Mejoría en piel, contracturas articulares y ROM | Muy baja |
| **Beyer 2010 (82)**  Revisión | Inhibidores de tirosin cinasa y de la señalización VEGF | Imatinib  Estudios preclínicos de nilotinib, dasatinib  Otros posibles: emaxinib, vatalanib, sutent y sorafenib | Eficacia de imatinib  Nuevas posibilidades terapéuticas | Baja |
| **Zhou 2010 (83)**  Estudio prospectivo | N= 4  ≥ 2 ttos previos | Células madre mesenquimales  Rodnan modificado y evaluación de ROM | Alivio del dolor, mejoría de la piel y de la movilidad articular | Muy baja |
| **Distler 2010 (84)**  Revisión |  | Imatinib, dasatinib, nilotinib | Justificación del tto con inhibidores de tirosin cinasa como terapia antifibrótica | Baja |
| **Karfan – Dabaja 2009 (85)**  *Revisión sistemática* | 7 estudios (3 prospectivos, 4 retrospectivos)  Rituximab en EICRc refractaria a corticoides | Criterios NIH  Respuesta parcial o completa  Morbimortalidad  Afectación por órganos | Respuesta 100% y 75% en manifestaciones musculoesqueléticas  Posibilidad de reducción de corticoides e IS | Moderada |
| **Magro 2009 (86)**  Estudio retrospectivo | N= 14  Tto con imatinib 400mg diarios | A los 2 meses del inicio y después mensual  - Rodnan modificada  - ROM | Respuesta en 50%, mejoría Rodnan ≥ 90%  Reducción significativa corticoides | Muy baja |
| **Kroft 2008 (87)**  *Revisión sistemática* (enero 1996-noviembre 2007) | UVA de espectro completo (320-400 nm) y UVA-1 | Evaluar eficacia, efectos biológicos y efectos secundarios de UVA-1 en fascitis eosinofílica y EICRc | UVA y UVA-1 parece eficaz en tto de enfermedades escleróticas de la piel  UVA-1 puede prevenir progresión de la enfermedad, incluidas las contracturas | Moderada |
| **Moreno–Romero 2008 (88)**  Caso aislado | Varón 18 años  +24 meses Post-T  Esclerosis y gran restricción de ROM  > 4 ttos previos | Imatinib 100mg/día  Monitorización estrecha | No lesiones cutáneas activas  Mejoría en movilidad | Muy baja |
| **Okamoto 2006 (89)**  Casos aislados | N= 3  EICRc progresiva tipo extensivo  Esclerodermia y contracturas en flexo | Rituximab 375mg/m2 iv semanal 4 semanas + IS previos  Rodnan modificada en semanas 8 y 16  Biopsia cutánea | Mejoría cutánea en todos lo pacientes  Biopsia: reducción significativa de fibras de colágeno | Muy baja |
| **Wetzig 2005 (90)**  Serie de casos | N= 10  UVA 1 en EICRc  Mediana +200 días Post-T | Evaluación de la piel y ROM | Buena tolerancia  Reducción/supresión de corticoides en 60%  RC 60% y parcial en 30% | Muy baja |
| **Brenner 2005 (91)**  Revisión | Fototerapia y fotoquimioterapia | EICRc esclerodermiforme | Mejoría de piel y movilidad articular | Muy baja |
| **Dinçer 2004 (92)**  Caso aislado | Varón 29 años  EICRc esclerodermatosa con disminución de ROM | Tto con lámina tópica de gel de silicona durante 6 meses | Mejoría de la piel y del ROM | Muy baja |
| **Pines 2003 (93)**  Caso aislado | Varón 22 años  +100 días Post-T EICRc grave, extensa con afectación cutánea con contracturas, mucosa, gastrointestinal y hepática | Halofuginona: inhibidor de síntesis de colágeno tipo I  Aplicación tópica de halofuginona durante 6 meses en hemicuerpo izquierdo (lado derecho como control) | Mejoría de la piel, el dolor, la disfagia y la movilidad articular en el lado tratado  Biopsia con disminución de colágeno (efecto reversible 3 meses después) | Muy baja |
| **Ständer 2002 (94)**  Estudio prospectivo | N= 6  EICRc esclerodérmica | UVA 1 (340-400nm) | Mejoría cutánea y de ROM | Muy baja |
| **Voltarelli 2001 (95)**  Casos aislados | - Varón 11 años  +530 días Post-T  Lesiones esclerodérmicas y contracturas  - Mujer 20 años  +1350 días Post-T  Lesiones cutáneas | Lidocaína 400mg iv 4 pulsos/mes, 2 pulsos en 6 meses en caso 1 y en 12 meses en caso 2; posteriormente 2 pulsos/mes | Mejoría en ROM y piel, disminución de IS en caso 1  Mejoría del dolor y las lesiones cutáneas en caso 2 | Muy baja |
| **Grundmann–Kollmann 2000 (96)**  Caso aislado | Varón 42 años  +12 meses Post-T  Esclerosis cutánea y contracturas articulares | Biopsia y valoración ecográfica (20MHz)  ROM antes y después del tto  UVA 1 (340-400nm): 4 veces/semana durante 4 semanas, luego 2 veces/semana | Muy buena respuesta cutánea y gran mejoría en ROM  Ecografía y biopsia con reducción de infiltrado y esclerosis | Muy baja |

##

## Glosario y código de colores

- AVD: actividades de la vida diaria
- CMM: células madre mesenquimales
- EICR: enfermedad injerto contra receptor
- EICRa: enfermedad injerto contra receptor aguda
- EICRc: enfermedad injerto contra receptor crónica
- FEC: fotoféresis extracorpórea
- IFN: interferón
- IL: interleucina
- Short Physical Performance Battery (SPPB); consta de 3 tests: equilibrio, velocidad de la marcha y levantarse y sentarse en una silla 5 veces.
- IS: inmunosupresores
- i.v.: intravenoso
- NIH: Instituto Nacional de Salud Norteamericano (escala articular/fascial)
- OCT: tomografía de coherencia óptica
- PRO: patient reported outcomes
- P- ROM: photographic range of motion
- PUVA: psoraleno + fototerapia UVA
- RC: remisión completa
- RHB: rehabilitación
- RM: resonancia magnética
- ROM: range of motion
- RTX: rituximab
- TAC: tomografía axial computerizada
- Tto: tratamiento
- UVA: ultravioleta A
- v.o.: vía oral
- VSS: Vienna Skin Score

| **Código de colores** | |
| --- | --- |
|  | Artículos relacionados con fascitis |
|  | Artículos relacionados con artropatías |
|  | Articulos sobre tratamiento en EICR crónica con fenotipo esclerótico y afectación fascial y/o articular |

## Anexo 4. Hoja de recogida de puntuación para afectación articular y fascial (NIH 2015 (10))


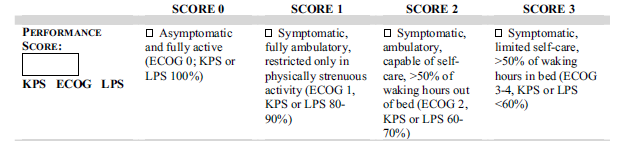

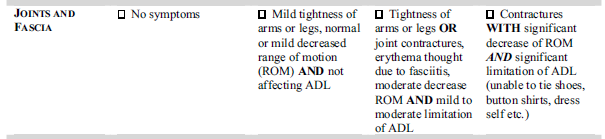

Supplement: mmc1 [file S1699258X22002832:mmc1.doc]
